# Supplementary material for: Freestanding nanocellulose-composite fibre reinforced 3D polypyrrole electrodes for energy storage applications
Source: Royal Society of Chemistry journal article supplement (doi:10.1039/c4nr04642k), 2014-01-01
Supplement: c4nr04642k1.pdf [file c4nr04642k1.pdf]

## Supporting Information

### **Freestanding nanocellulose-composite fibre reinforced 3D polypyrrole electrodes for energy storage applications**

Zhaohui Wang,\* Petter Tammela, Peng Zhang, Jinxing Huo, Fredric Ericson, Maria Strømme,\* and Leif Nyholm\*

Dr. Z.H. Wang, Prof. L. Nyholm

Department of Chemistry-The Ångström Laboratory, Uppsala University, Box 538, SE-751  
21 Uppsala, Sweden

E-mail: [zhaohui.wang@kemi.uu.se](mailto:zhaohui.wang@kemi.uu.se); [leif.nyholm@kemi.uu.se](mailto:leif.nyholm@kemi.uu.se)

J.X. Huo

Applied Mechanics, Department of Engineering Sciences, The Ångström Laboratory,  
Uppsala University, Box 534, SE-751 21 Uppsala, Sweden

Prof. F. Ericson,

Division of Microsystems Technology, Department of Engineering Sciences, The Ångström  
Laboratory, Uppsala University, Box 534, SE-751 21 Uppsala, Sweden.

P. Tammela, P. Zhang, Prof. M. Strømme

Nanotechnology and Functional Materials, Department of Engineering Sciences, The  
Ångström Laboratory, Uppsala University, Box 534, SE-751 21 Uppsala, Sweden

E-mail: [maria.stromme@angstrom.uu.se](mailto:maria.stromme@angstrom.uu.se)

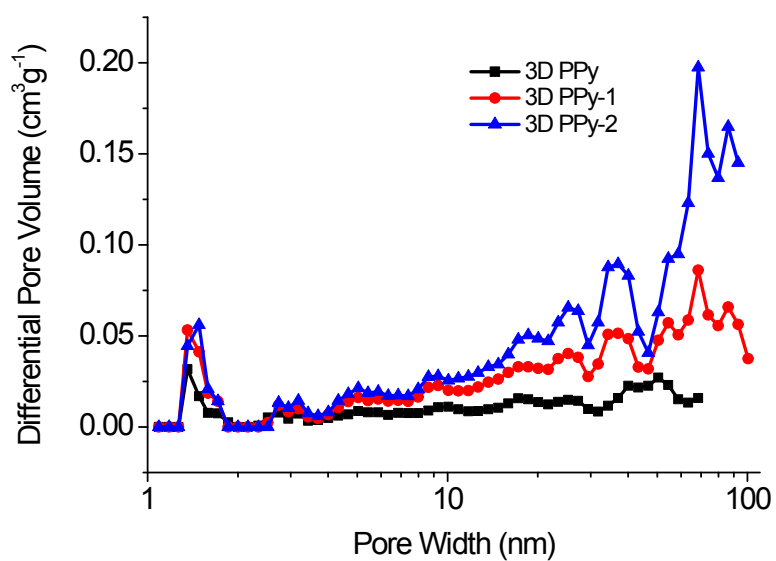

Figure S1. Pore size distributions for the 3D PPy, 3D PPy-1 and 3D PPy-2 samples.

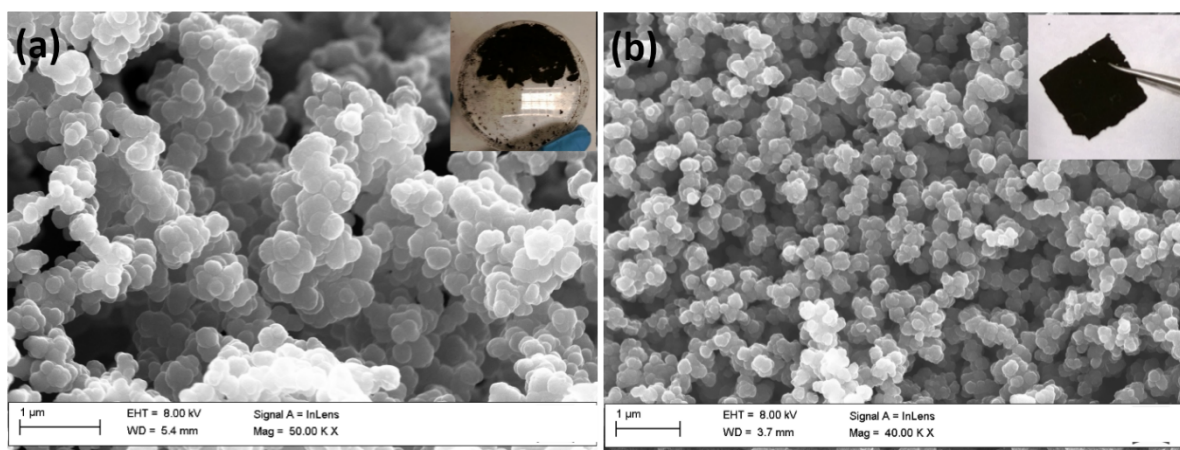

Figure S2. SEM image of PPy powder prepared without phytic acid (a), where the inset shows a photograph of the PPy particles, as well as a corresponding SEM image for a 3D PPy paper electrode (b) where the inset shows the obtained paper-like material.

Table S1. Elastic moduli for the different PPy composites.

|          | Sample 1 | Sample 2 |
|----------|----------|----------|
| 3D PPy   | 0.27 MPa | 0.26 MPa |
| 3D PPy-1 | 0.59 MPa | 0.59 MPa |
| 3D PPy-2 | 0.91 MPa | 0.86 MPa |

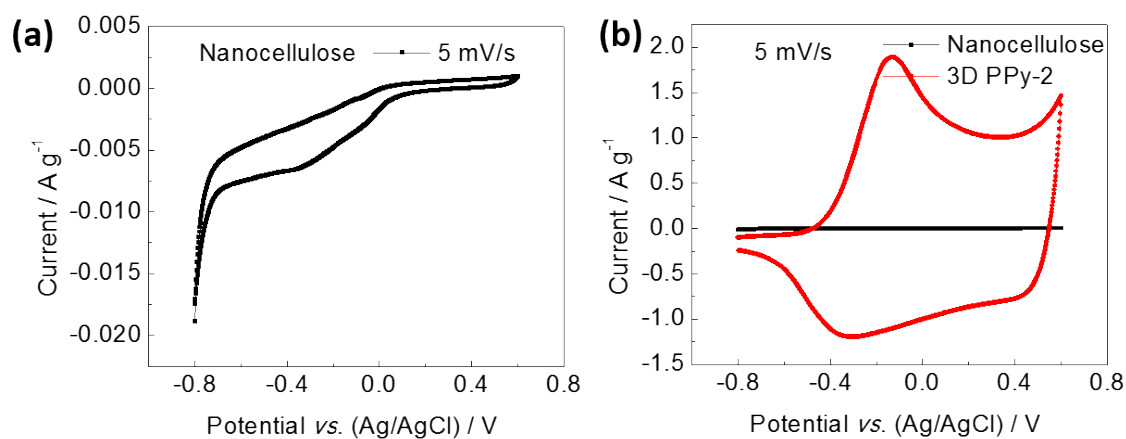

Figure S3. CVs recorded in 2 M NaCl solution for the nanocellulose (a) and both the nanocellulose and the composite (b). The specific capacitance for the nanocellulose in 2 M NaCl was 0.1 F/g, indicating that the nanocellulose does not contribute to the charge capacity of the composites.

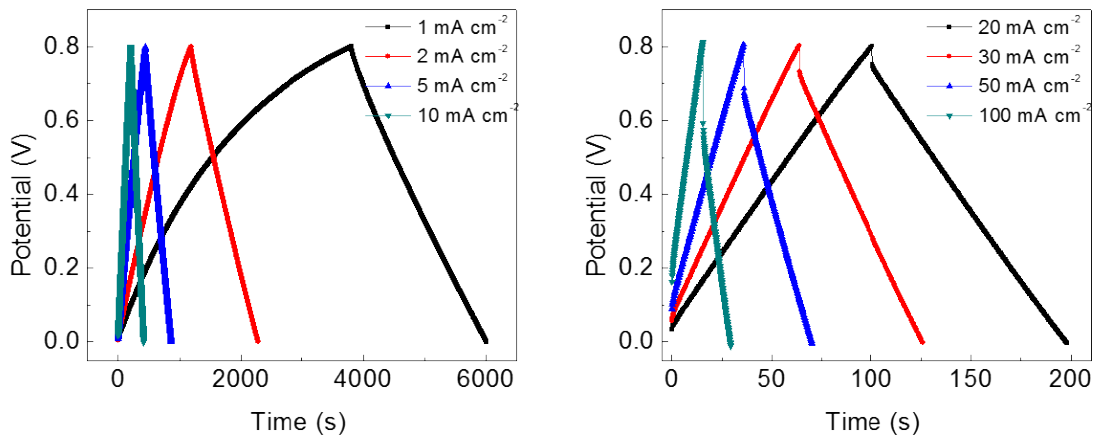

Figure S4. Galvanostatic charge/discharge curves acquired at different currents for 3D PPy-2 sample.

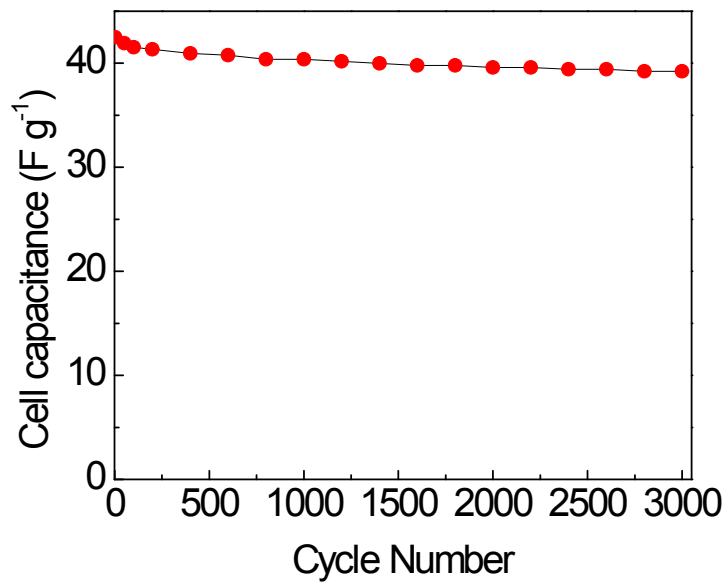

Figure S5. Long-term cycling performance for the symmetric energy storage device based on 3D PPy-2 sample.
